# Supplementary material
Source: PubMed Central journal article supplement (PMC4498204)
Supplement: supp_tpc.15.00103_TPC2015-00103-RAR1_Supplemental_Data.pdf [file supp_tpc.15.00103_TPC2015-00103-RAR1_Supplemental_Data.pdf]

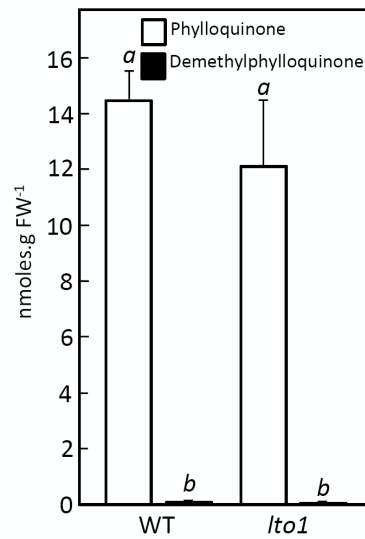

**Supplemental Fig.1.** Quantification of phyloquinone and of demethylphyloquinone in the leaves of wild-type and *lto1* knockout plants. Same letter annotations above the error bars indicate that the corresponding values are not significantly different as determined by Fisher's least significant difference test from ANOVA ( $p > 0.1$ ). Data are the means of 4 replicates  $\pm$  SE.
